# Supplementary material
Source: publisher figshare collection journal article supplement (https://frontiersin.figshare.com/ndownloader/files/13085264)
Supplement: Supplementary file [file 13085264]

# *Supplementary Material* **Desiccation- and saline-tolerant bacteria and archaea in** **Kalahari pan sediments**

Steffi Genderjahn\*, Mashal Alawi, Kai Mangelsdorf, Fabian Horn, Dirk Wagner

Correspondence: Steffi Genderjahn: [steffi.genderjahn@gfz-potsdam.de](mailto:steffi.genderjahn@gfz-potsdam.de)

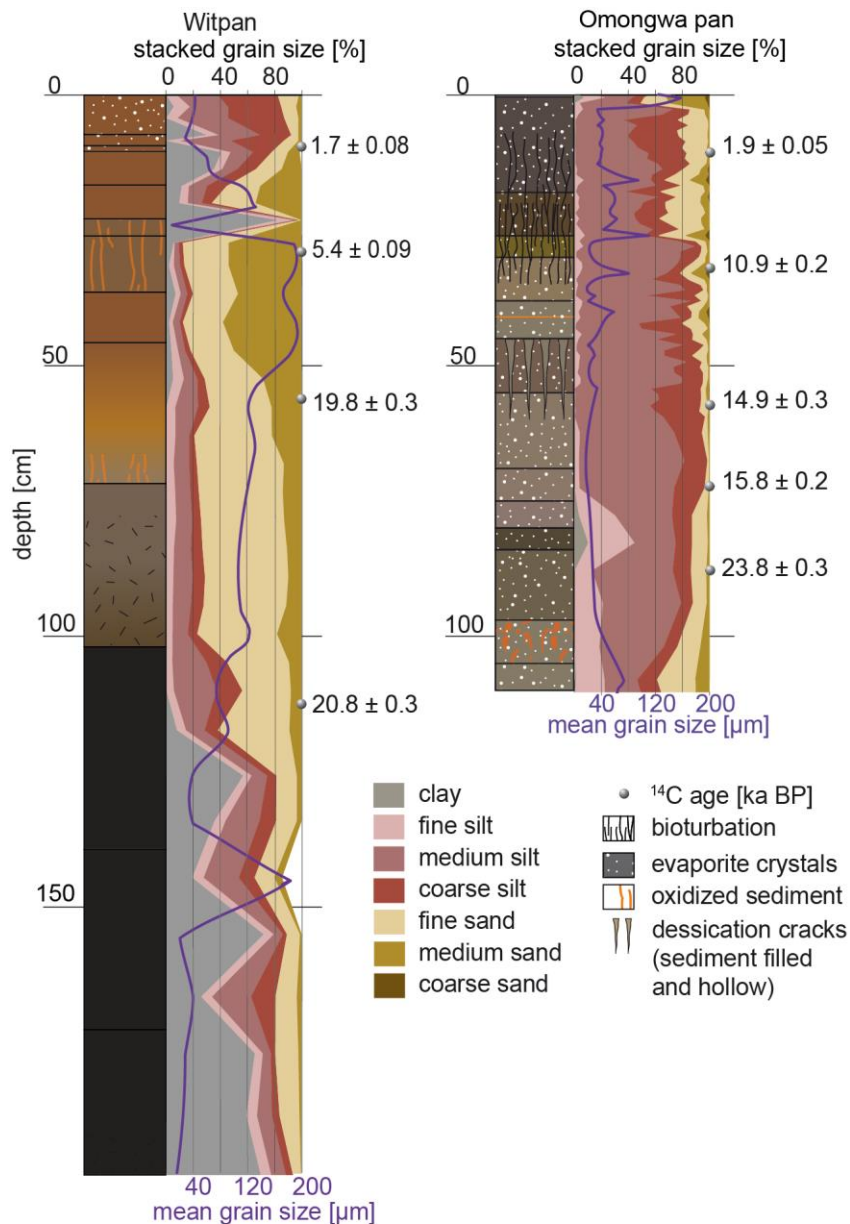

**Figure S1:** Sedimentological profile with stacked grain size distribution and mean grain size (0 – 250 μm; violet line) of Witpan and Omongwa pan. Sediment colors refer to the Munsell soil color chart. After Schüller et al. (2018)
